# Supplementary material
Source: PubMed Central journal article supplement (PMC6309853)
Supplement: NIHMS999187-supplement-Supp_Online_Materials.pdf [file NIHMS999187-supplement-Supp_Online_Materials.pdf]

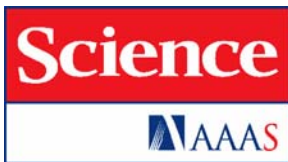

## Supporting Online Material for

### **Clr4/Suv39 and RNA Quality Control Factors Cooperate to Trigger RNAi and Suppress Antisense RNA**

Ke Zhang, Tamas Fischer, Rebecca L. Porter, Jothy Dhakshnamoorthy,  
Martin Zofall, Ming Zhou, Timothy Veenstra, Shiv I. S. Grewal\*

\*To whom correspondence should be addressed. E-mail: [grewals@mail.nih.gov](mailto:grewals@mail.nih.gov)

Published 25 March 2011, *Science* **331**, 1624 (2011)  
DOI: 10.1126/science.1198712

#### **This PDF file includes:**

Materials and Methods  
Figs. S1 to S14  
Tables S1 to S3  
References

**Table S1**  
**Two-hybrid screening for Clr4-interacting factors identify Mlo3 protein**

| Total clones<br>screened | Screened clones                   |                                                    | Sequenced<br>clones | Mlo3 clones |
|--------------------------|-----------------------------------|----------------------------------------------------|---------------------|-------------|
|                          | Ade <sup>+</sup> His <sup>+</sup> | Ade <sup>+</sup> His <sup>+</sup> Mel <sup>+</sup> |                     |             |
| >2 X10 <sup>6</sup>      | 63                                | 15                                                 | 20                  | 10          |
|                          | 15                                | 5                                                  |                     |             |

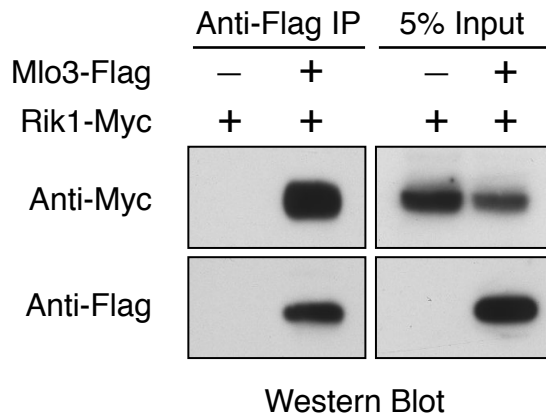

**Figure S1. ClrC component Rik1 interacts with Mlo3.** IP using anti-Flag antibody was followed by Western blot with anti-Myc antibodies. A longer exposure time was used to obtain the image shown for the anti-Myc input blot compared to that of IP blot.

**Figure S1**

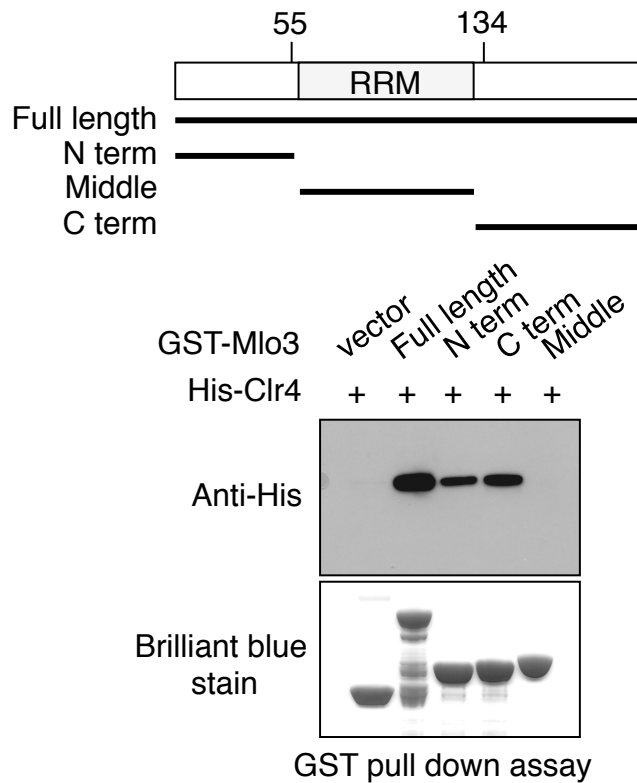

**Figure S2. Clr4 interacts with Mlo3 in vitro.** His-Clr4 GST pull-down assay using full-length or truncated Mlo3 proteins was followed by Western analysis using anti-His antibody to detect the presence of His-Clr4 or brilliant blue staining to visualize the GST fusion proteins. Schematic diagram shows various Mlo3 domains. GST fusions of Mlo3 are indicated. N-term: amino-terminal (1-55aa), C-term: carboxy-terminal (134-199aa); Middle: the RRM domain (56-134aa) and Vector: GST alone.

**Figure S2**

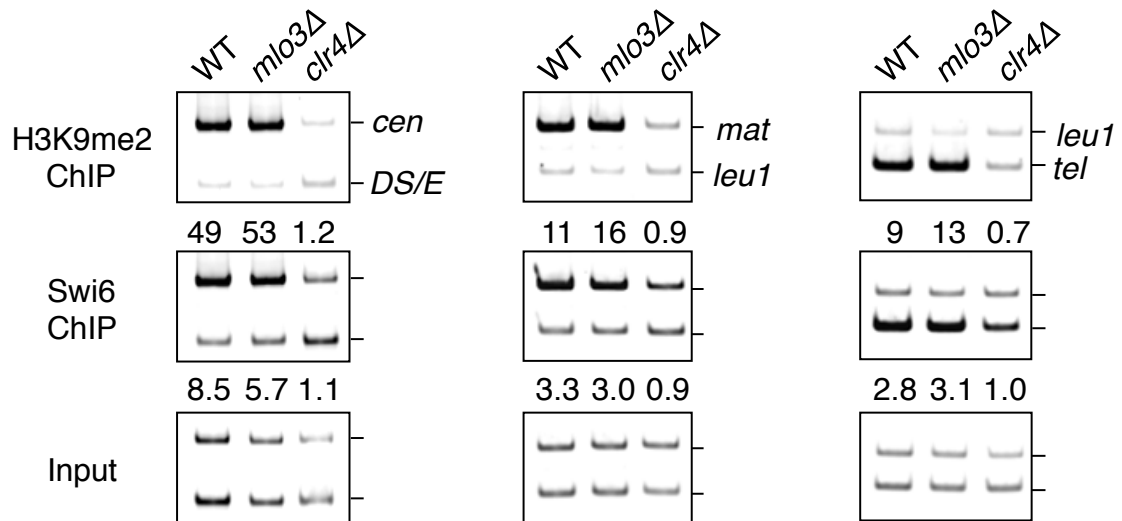

**Figure S3. *mlo3*Δ cells maintain H3K9me2 and Swi6 localization at centromeres, mating type locus and subtelomeric loci.** DNA isolated from ChIP and whole cell extract (Input) was analyzed by multiplex PCR, with primers designed to amplify *ura4<sup>+</sup>* inserted at centromere 1 (*cen*), the mating type locus (*mat*) or subtelomeric region (*tel*) and the internal control corresponding to a euchromatic gene (*DS/E* or *leu1*). Relative enrichment (shown below each lane) was calculated by dividing the intensity ratio of bands corresponding to heterochromatic and control euchromatic loci in the ChIP sample with those of input.

**Figure S3**

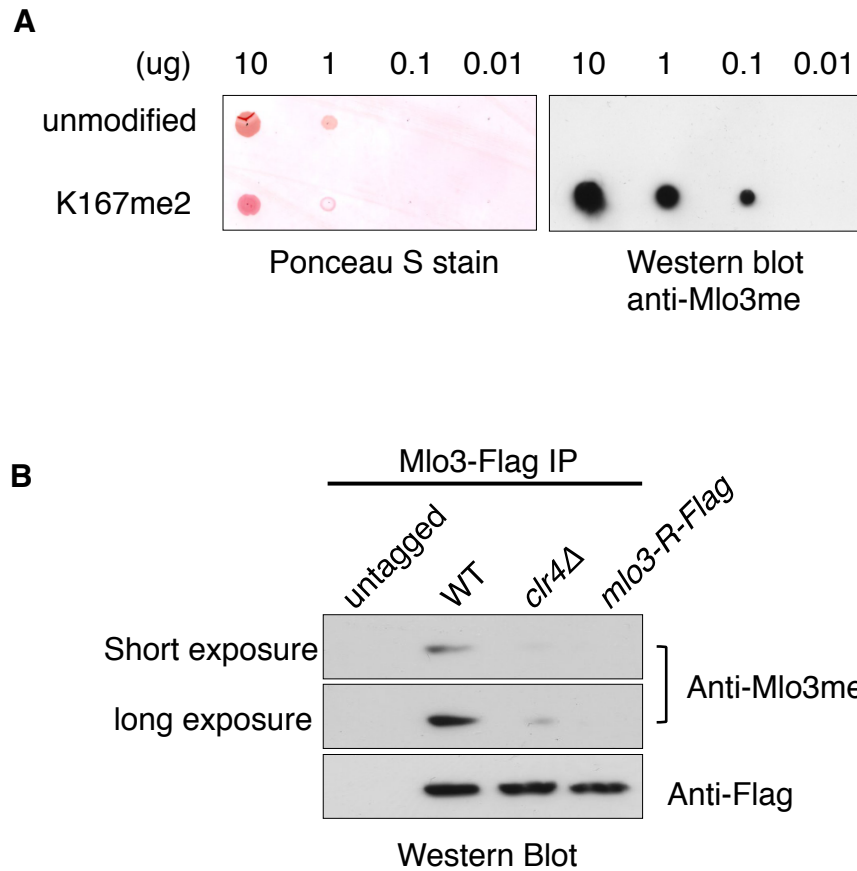

**Figure S4. Detection of Mlo3 methylation in vivo.** (A) Western blot using affinity purified anti-Mlo3me was performed to detect unmodified or methylated Mlo3 peptides serially diluted and spotted onto nitrocellulose membrane. Poncean S stain show the loading of peptides. (B) Flag tagged Mlo3 was immunoprecipitated using conjugated Flag agarose from indicated yeast strain extracts. Western blots were performed using anti-Flag antibody as the loading control (bottom) or using anti-Mlo3me to detect methylated Mlo3. *mlo3-R-Flag*: *mlo3K165RK167R-Flag*

**Figure S4**

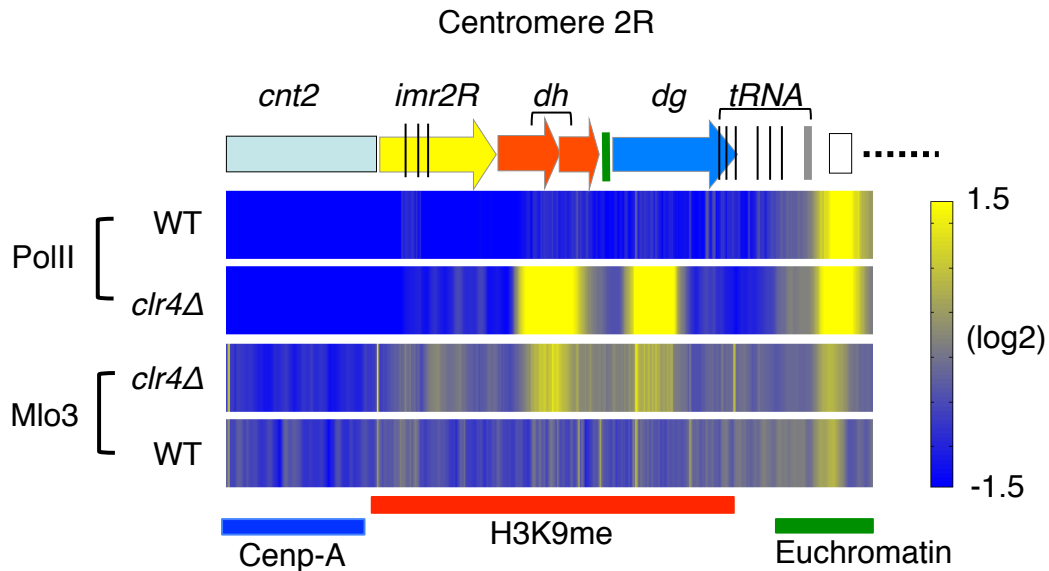

**Figure S5. Mlo3 localization at pericentromeric *dg* and *dh* repeat elements.** Heat map indicating levels of Pol II and Mlo3-Flag in wild type (WT) or *clr4Δ* cells determined by ChIP-chip are shown in alignment with the physical map of the right region of centromere 2 (centromere 2R). The centromere 2R is annotated according to 2004 *S. pombe* Sanger Center database release. Red, green and blue lines at bottom indicate pericentromeric heterochromatic regions enriched for methylated H3K9 (H3K9me), euchromatic region and central core region containing Cenp-A, respectively.

**Figure S5**

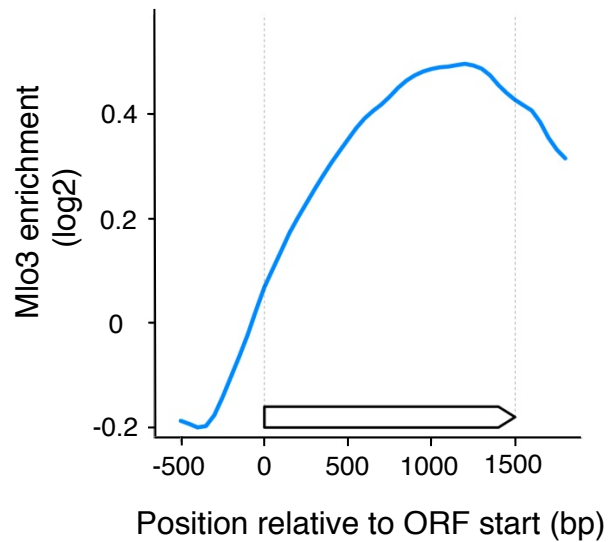

**Figure S6. Mlo3 is enriched at genes with the peak toward the 3' end of ORF.** ORFs were divided into 30 equally sized segments. Geometric averages of the corresponding segments between ORFs were calculated and plotted as average enrichments over a 50bp region. 0 in X-axis represents the beginning of the ORF, and 1500 bp represents the end of the ORF. Y axis shows the average enrichment in log2 scale.

**Figure S6**



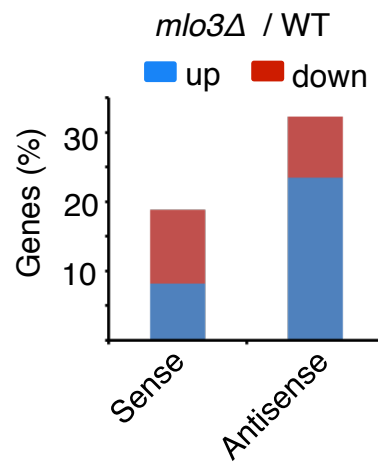

**Figure S7. Sense and antisense transcriptome analysis in *mlo3Δ* mutant cells.** The percentage of genes with at least 2-fold altered mean transcript levels in *mlo3Δ* cells, as compared to wild-type cells was plotted.

**Figure S7**

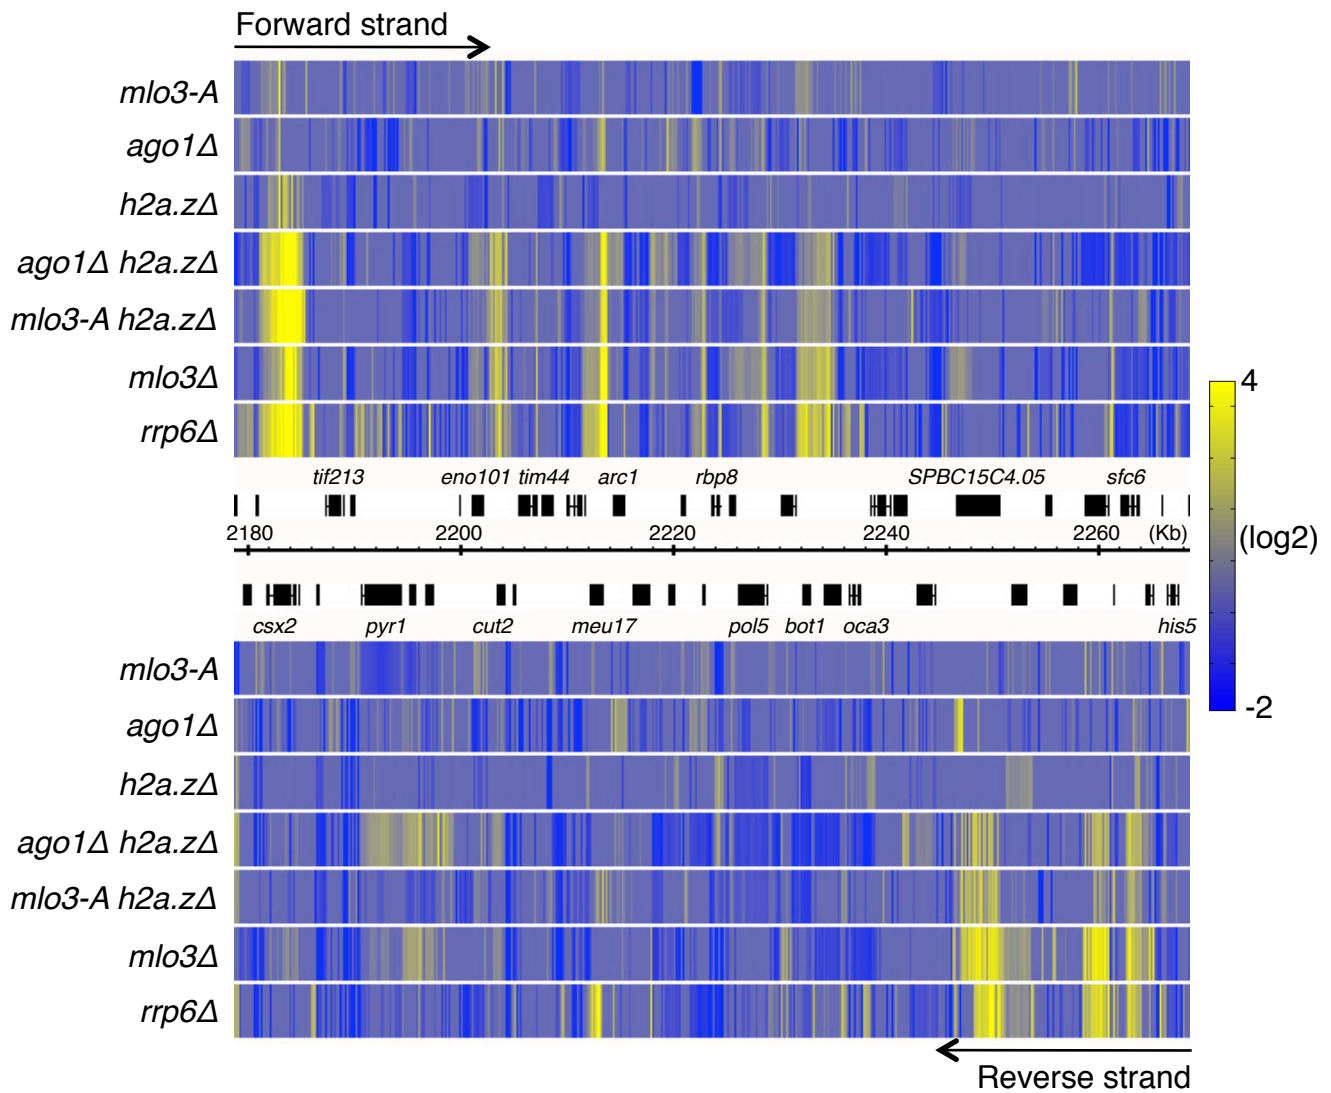

**Figure S8. Representative genomic regions with elevated antisense transcripts in indicated mutants.** Expression profiling was performed using high density tiling microarray. The increase in levels of antisense RNA is shown by the heat map. Forward transcripts are shown on top, and reverse transcripts are shown on the bottom. Relative expression values (mutants as indicated / WT) were converted into color gradient.

**Figure S8**

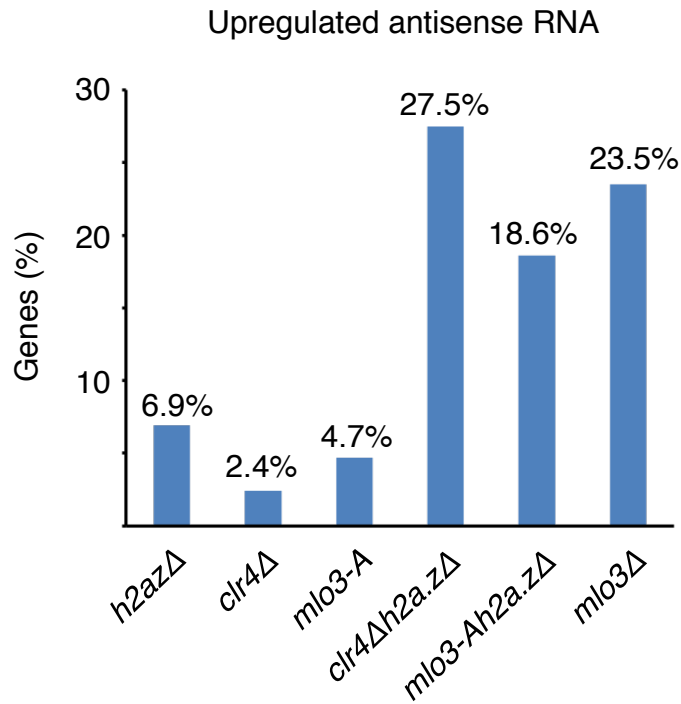

**Figure S9. Levels of antisense RNA in single and double mutants.** Upregulated antisense RNA was estimated as a percentage of genes (%) shown on the top of each bar representing the indicated strains.

**Figure S9**

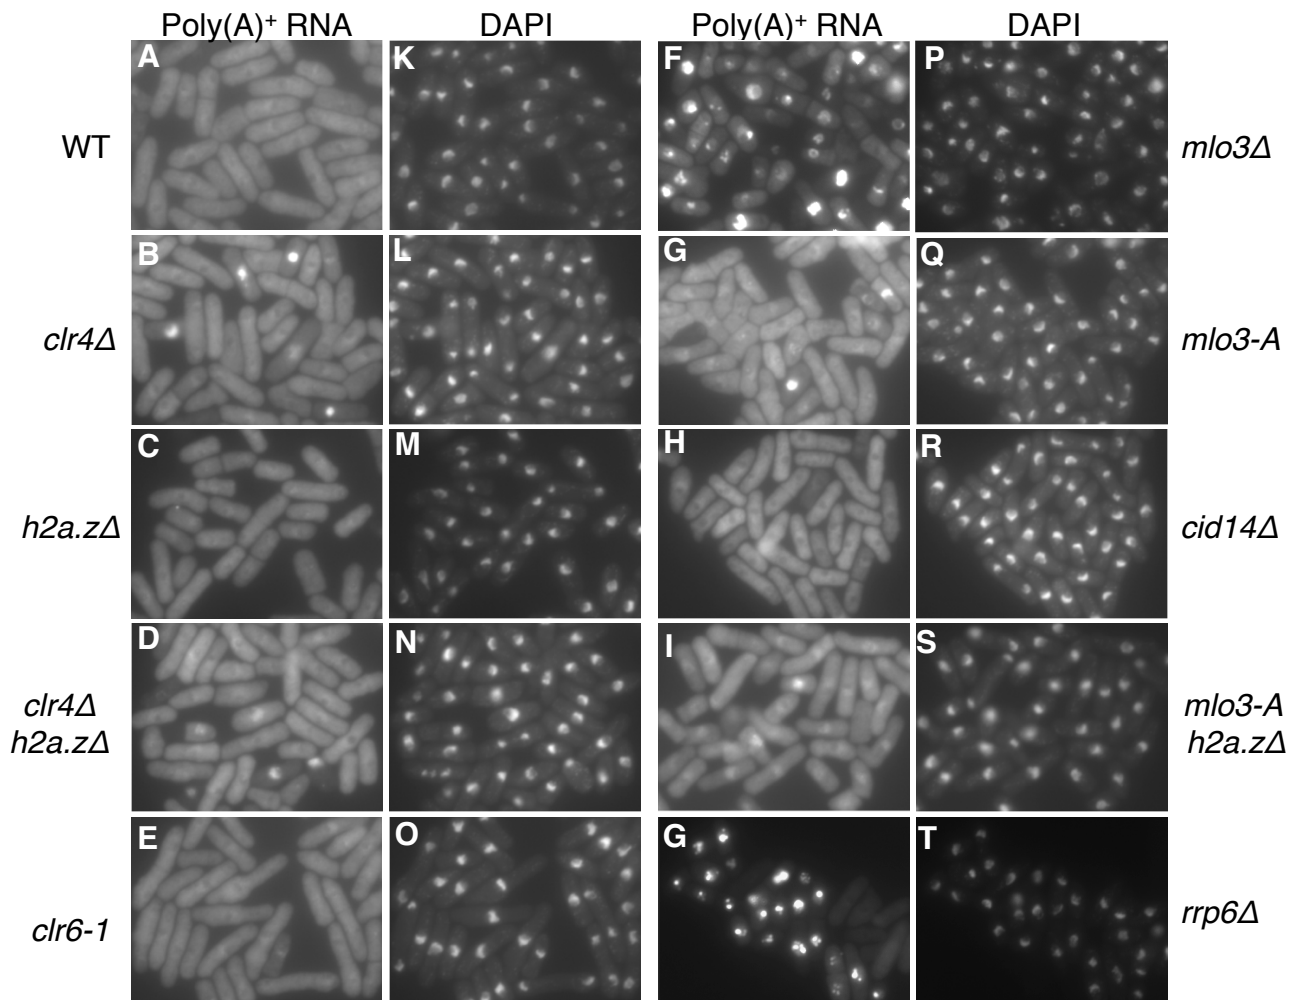

**Figure S10. *clr4Δ* and *mlo3-A* mutants similarly show nuclear accumulation of poly(A)<sup>+</sup> RNA.** In situ hybridization of poly(A)<sup>+</sup> RNA in indicated strains is shown (A-G). The corresponding right panel (K-T) show DAPI-stained nuclei. *clr4Δh2a.zΔ* (D) or *mlo3-Ah2a.zΔ* (I) mutants, which show highly elevated levels of antisense RNA, do not display corresponding increase in poly(A)<sup>+</sup> RNA in the nucleus. Moreover, deletion of Cid14 subunit of TRAMP or a mutation in Clr6 histone deacetylase, which is known to cause global increase in acetylation of histones and elevated levels of antisense transcripts originating from cryptic promoters, is not associated with nuclear accumulation of poly(A)<sup>+</sup> signal. *rrp6Δ* cells (G) also accumulate poly(A)<sup>+</sup> RNA in the nucleus in a manner similar with *mlo3Δ* cells (F). The phenotypic similarity between *rrp6Δ* and *mlo3Δ* may be due to defects in RNA export and/or in degradation of aberrant RNA.

**Figure S10**

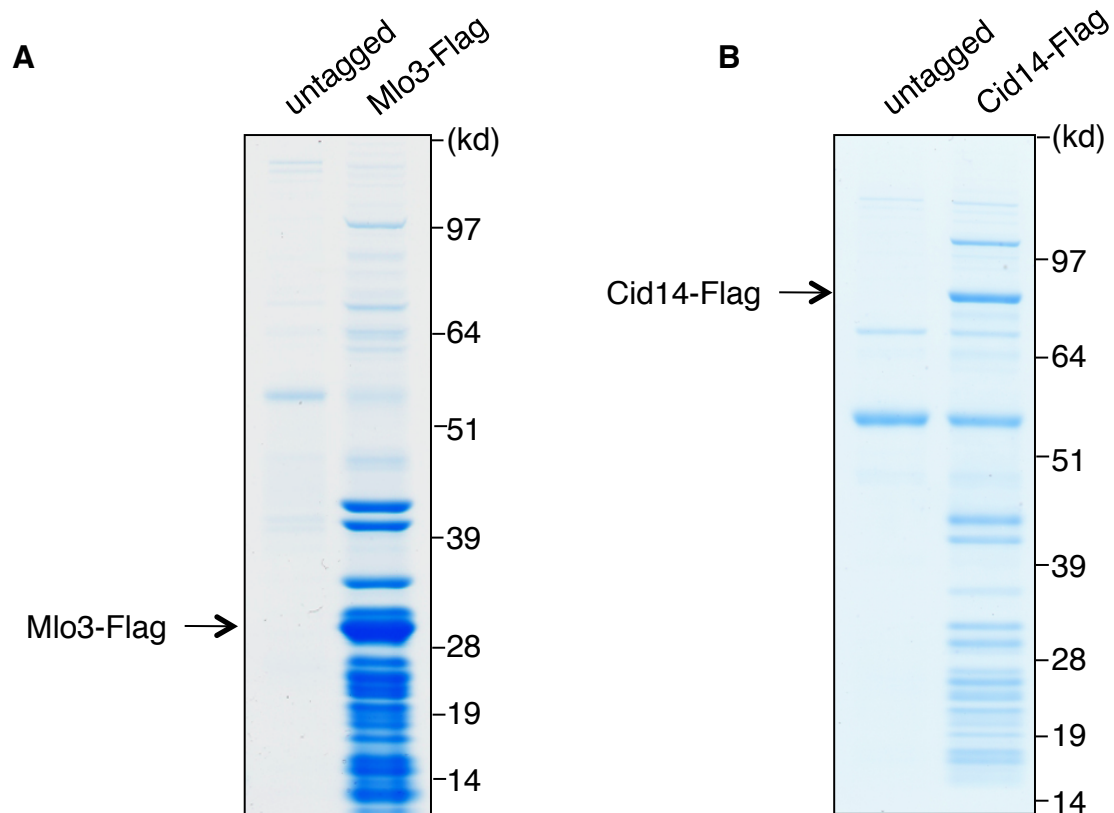

**Figure S11. Purification of Mlo3-Flag and Cid14-Flag associated proteins.** Brilliant blue stained 4-12% NuPAGE gels showing the purification of Mlo3-Flag (**A**) and Cid14-Flag (**B**) with their control purification from an untagged strain. The gel running position of Flag-tagged protein used for each purification is indicated.

**Figure S11**

**Table S2****List of proteins identified in Mlo3-Flag purification**

| Gene Name         | No. of amino acids recovered | Coverage (%) |
|-------------------|------------------------------|--------------|
| Mlo3              | 161                          | 80.90        |
| Mtr4              | 114                          | 16.67        |
| Cid14             | 55                           | 4.92         |
| Air1              | 29                           | 9.27         |
| H4                | 39                           | 37.86        |
| Sal3              | 347                          | 31.69        |
| SPCP1E11.11       | 167                          | 26.01        |
| Nog1              | 160                          | 24.92        |
| Sik1              | 118                          | 23.74        |
| SPAC22G7.05       | 140                          | 23.41        |
| SPCC126.11c       | 42                           | 22.95        |
| Ebp2              | 72                           | 21.62        |
| Nop58             | 109                          | 21.46        |
| H2B               | 27                           | 21.43        |
| Srp2              | 71                           | 19.45        |
| SPBC4F6.13c       | 140                          | 19.02        |
| ppp1              | 111                          | 18.29        |
| pescadillo-family | 53                           | 17.79        |
| Sla1              | 23                           | 17.42        |
| H2A               | 61                           | 16.53        |
| Rnp24             | 51                           | 16.09        |
| Rpf2              | 97                           | 15.25        |
| Ded1              | 62                           | 13.08        |
| Upf1              | 119                          | 12.86        |
| H3                | 17                           | 12.50        |
| Brx1              | 35                           | 11.86        |
| Nop12             | 51                           | 11.64        |
| Pwp1              | 59                           | 11.43        |
| Noc1              | 95                           | 11.05        |
| SPBC4F6.14        | 74                           | 10.98        |
| Rrs1              | 18                           | 10.84        |
| SPCC16C4.16c      | 17                           | 10.56        |
| Has1              | 61                           | 10.55        |
| Cic1              | 37                           | 9.92         |
| Noc2              | 59                           | 8.35         |
| Nop52             | 17                           | 7.83         |
| Utp23             | 19                           | 7.31         |
| Gar1              | 13                           | 6.70         |
| Mak16             | 18                           | 5.96         |
| Gtp1              | 20                           | 5.49         |
| Utp21             | 48                           | 5.32         |
| Exo2              | 69                           | 5.20         |

Ribosomal proteins and proteins with less than 5% sequence coverage are not included in the list

**Table S3****List of proteins identified for Cid14-Flag purification**

| Gene Name              | No. of amino acids recovered | Coverage (%) |
|------------------------|------------------------------|--------------|
| Cid14                  | 563                          | 82.31        |
| Mtr4                   | 779                          | 69.74        |
| Air1                   | 158                          | 50.48        |
| Mlo3                   | 153                          | 76.88        |
| Rpf2                   | 138                          | 43.53        |
| UPF0462                | 45                           | 38.46        |
| H2B                    | 45                           | 35.71        |
| Nog1                   | 212                          | 33.02        |
| Sla1                   | 97                           | 32.55        |
| Dbp2                   | 179                          | 32.55        |
| Rlp24                  | 56                           | 29.17        |
| H4                     | 30                           | 29.13        |
| Brx1                   | 74                           | 25.08        |
| Srp2                   | 90                           | 24.66        |
| Nop53 (rrp16)          | 103                          | 24.58        |
| H2A                    | 30                           | 22.73        |
| eIF4G                  | 318                          | 22.67        |
| Puf6                   | 143                          | 22.27        |
| eIF6                   | 54                           | 22.13        |
| Ded1                   | 136                          | 21.38        |
| Sik1                   | 96                           | 19.32        |
| Grn1                   | 90                           | 19.15        |
| notchless-like protein | 95                           | 18.92        |
| ribosome export GTPase | 100                          | 18.62        |
| Ebp2                   | 62                           | 18.62        |
| Rnp24                  | 67                           | 18.16        |
| Sec65                  | 35                           | 17.59        |
| SPCC126.11c            | 31                           | 16.94        |
| Nsa2                   | 42                           | 16.15        |
| Rrp15                  | 33                           | 16.10        |
| Rrs1                   | 26                           | 15.66        |
| Nop58                  | 79                           | 15.55        |
| eIF2 beta              | 49                           | 15.26        |
| eIF2alpha              | 44                           | 14.38        |
| Nob1                   | 53                           | 13.66        |
| eIF2gamma              | 59                           | 13.23        |
| eIF5A                  | 18                           | 11.46        |
| Tho complex            | 31                           | 11.31        |
| Fmp31                  | 19                           | 11.11        |
| SPAC8F11.04            | 41                           | 10.99        |
| Rrp5                   | 178                          | 10.53        |
| DNA polymerase V       | 95                           | 9.91         |

**Table S3 continue****List of proteins identified for Cid14-Flag purification**

| Gene Name                    | No. of amino acids recovered | Coverage (%) |
|------------------------------|------------------------------|--------------|
| SPBC4F6.13c                  | 72                           | 9.78         |
| Nop2                         | 54                           | 8.88         |
| Ytm1                         | 39                           | 8.86         |
| SPAC10F6.08c (Ino80 subunit) | 30                           | 8.80         |
| Cwf9                         | 10                           | 8.70         |
| eIF3a                        | 78                           | 8.37         |
| Sce3                         | 32                           | 8.25         |
| EF-1 beta                    | 17                           | 7.94         |
| H3.1/H3.2                    | 10                           | 7.35         |
| Far10                        | 22                           | 7.31         |
| Nop12                        | 31                           | 7.08         |
| NIFK                         | 19                           | 6.88         |
| Sum1                         | 22                           | 6.71         |
| Gar1                         | 13                           | 6.70         |
| SPBC16A3.08c                 | 19                           | 6.69         |
| Utp15                        | 32                           | 6.48         |
| Fnx1                         | 34                           | 6.40         |
| eIF3c                        | 55                           | 5.99         |
| SPBC4F6.14                   | 40                           | 5.93         |
| Ppk9                         | 31                           | 5.83         |
| SPAC1093.04c                 | 28                           | 5.60         |
| SPBC16H5.08c                 | 34                           | 5.50         |
| Rec24                        | 19                           | 5.43         |
| SPBC16H5.12c                 | 37                           | 5.43         |
| Spb1                         | 43                           | 5.36         |
| SPCC736.12c                  | 23                           | 5.26         |
| SPBC365.04c                  | 12                           | 5.15         |

Ribosomal proteins and proteins with less than 5% sequence coverage are not included in the list



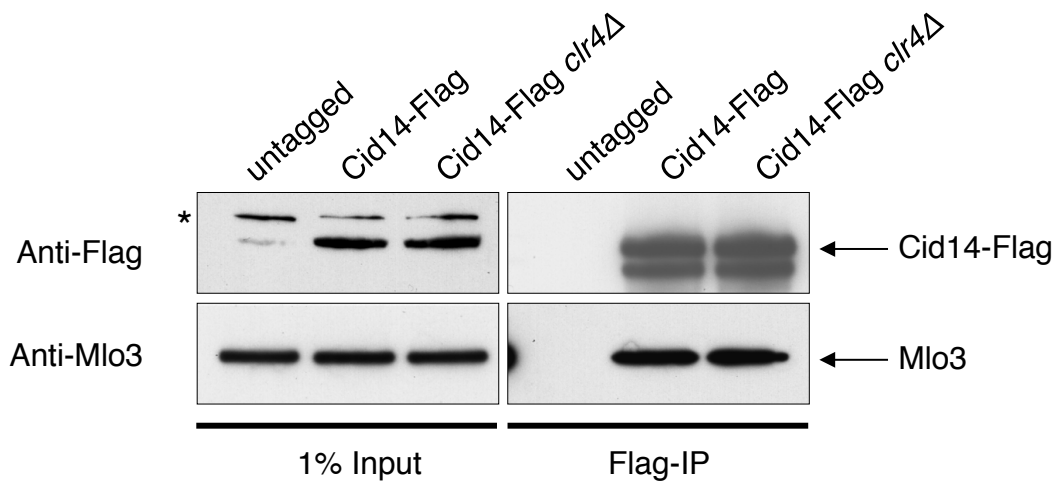

**Figure S12. The interaction between Mlo3 and TRAMP is not affected by deletion of Clr4.** IP from indicated strains using anti-Flag antibody was followed by Western blot with Mlo3 antibody. A longer exposure time was used to obtain the image shown for the anti-Flag input blot compared to that of IP blot. Asterisks indicate nonspecific bands.

**Figure S12**

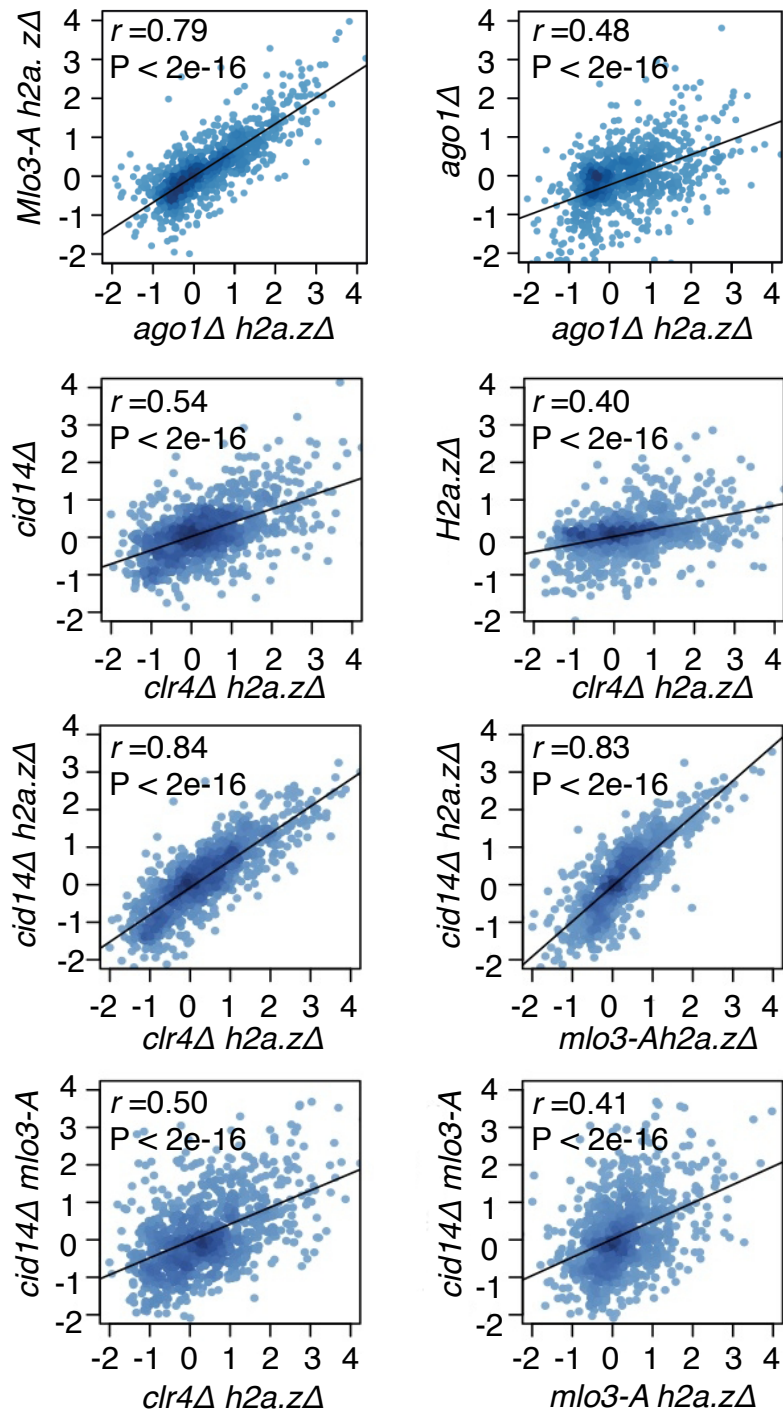

**Figure S13. Mlo3 suppresses antisense RNA at loci targeted by Clr4, RNAi and TRAMP.** Density plots comparing the upregulation of antisense transcripts in indicated mutants over wild type cells. Pearson's correlation coefficient ( $r$ ) and the  $P$  value of the linear regression for each pair are indicated.

**Figure S13**

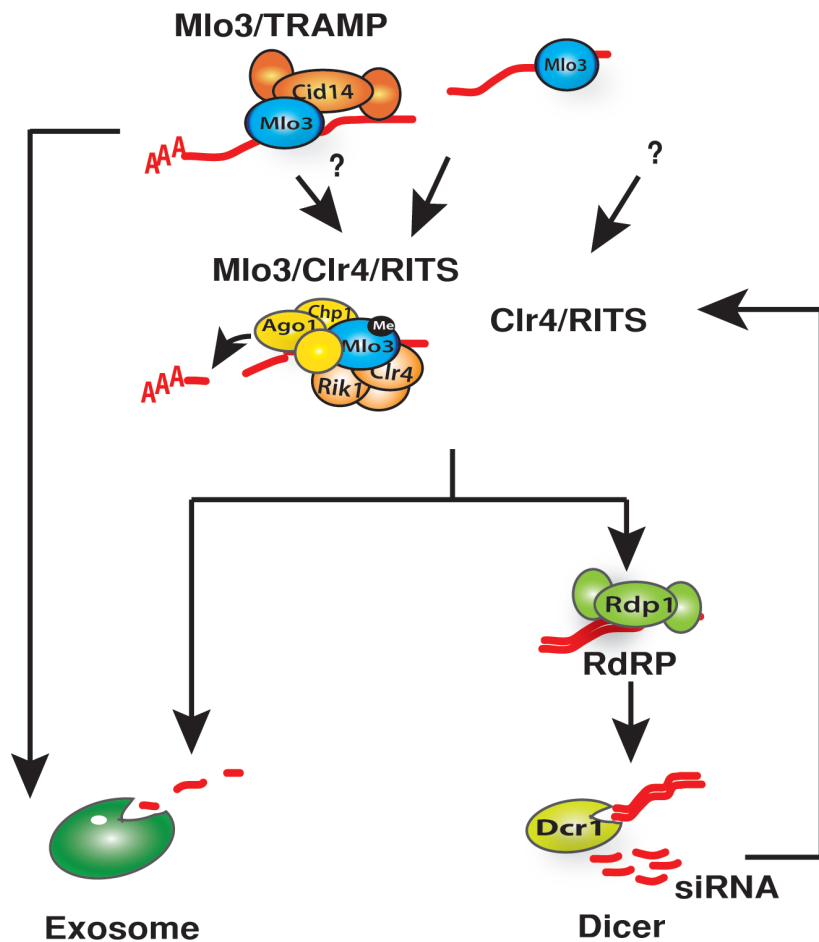

**Figure S14. Model showing processing of centromeric and antisense RNA by the coordinated action of Mlo3, TRAMP, Clr4, RNAi and the exosome.**

Centromeric and antisense RNAs are recognized by Mlo3 and/or Mlo3/TRAMP, which presumably tags transcripts for degradation via its polyadenylation activity. RNA targeted by Mlo3/TRAMP can be degraded directly by the exosome. Mlo3 also feeds RNAs into RNAi pathway via mechanism involving Clr4 that facilitates the interaction between Mlo3 and RITS. Clr4 also methylates H3K9 (not shown) and Mlo3 which could independently influence loading of RNA processing activities including RNAi factors to the sites of aberrant RNA production and/or facilitate the recognition of transcripts marked for degradation. Since siRNAs can be detected in *mlo3Δ* cells, it is likely that alternative mechanism(s) exist that targets RNAi machinery to centromeric RNAs. RNA substrates targeted by the Ago1/RITS are either processed via RNA-dependent RNA polymerase and Dicer to generate siRNA, or are degraded by 3'-5' exonuclease activity of the exosome.

**Figure S14**

## Online Materials and Methods

### Fission Yeast strains and plasmids

*mlo3-HA*, *mlo3-Flag*, *mlo3Δ*, and *cid14-Flag* strains were constructed with a PCR based method. To generate *mlo3* mutant strains, a PCR fragment containing *mlo3-Flag::KanMX* was cloned into pCR-Blunt II-TOPO vector (Invitrogen) to construct pCR-TOPO- *mlo3*-(3X)Flag::KanMX. Site-directed mutagenesis was used to introduce mutations into cloned *mlo3* using Quickchange<sup>TM</sup> protocols (Stratagene). The mutant alleles were then introduced into yeast by transforming a PCR fragment containing the mutant *mlo3*-(3X)Flag-kanMX cassette into a wild type strain and selecting for G418 positive colonies, which were subjected to DNA sequencing to confirm proper insertion of mutant *mlo3-Flag*. The plasmids used for expression of GST-Mlo3 were made previously (1). Site-directed mutagenesis of GST-Mlo3 was carried out using Quickchange<sup>TM</sup> protocols (Stratagene). The construction of *Flag-Clr4*, *cid14Δ*, *Rik1-Myc* strains used in this study was described previously (2-3). Standard genetic crosses were employed to construct all other strains. Yeast cells were grown according to standard procedures.

### Yeast-two hybrid screening

The coding sequence of Clr4 was PCR amplified and cloned into pGBKT7 (Clontech) to generate the bait plasmid pGBKT7-Clr4. The bait plasmid was transformed into the *S. cerevisiae* Y190 strain (*MATa ura3-52 his3-D200 lys2-801 ade2-101 typ1-901 leu2-3 112gal4Dgal80D LYS2::GAL-lacZ cyh<sup>r</sup>*). The presence of bait plasmid alone in Y190 does not activate reporter genes (data not shown). *S. pombe* cDNA library based on pGAD-GH (Clontech) was transformed into pGBKT7-Clr4 containing Y190 cells. Positive colonies were selected by plating the transformed cells on SD-HIS-LEU-TRP plates and assayed for β-galactosidase activity according to the manufacturer's instructions. Genomic DNA was isolated from positive colonies, and transformed into *E. coli*. The plasmids recovered from *E. coli* were subjected to DNA sequencing to identify the potential Clr4 binding factors.

### GST-pull down assay

Recombinant His-Clr4 and GST-Mlo3 were expressed in *E. coli* and purified as previously

described (1, 4). Binding assays were performed by incubation of 2-5 µg of purified proteins with Glutathione Sepharose™4B (GE healthcare) in 500 µl GST binding buffer (1xPBS plus 0.5 mM EDTA, 0.5% Np40, 1mM DTT and extra 100 mM NaCl) at 4°C for 2hr. The beads were washed four times with GST binding buffer, and the bound proteins were eluted by boiling the beads in 30µl 1x SDS loading buffer. Pulled down fractions were analyzed by Western blot analysis.

### ***In vitro* methyltransferase assay**

Approximately 5µg of purified GST-Mlo3 or His-tagged H3 was incubated with 1µCi of *S*-adenosyl-L-[methyl-<sup>3</sup>H]methionine (<sup>3</sup>H-AdoMet; 15 Ci/mmol; GE Healthcare) and 2 µg of recombinant His-Clr4 protein in 20 µl of MTase buffer (50 mM Tris pH 8.0, 20 mM KCl, 10 mM MgCl<sub>2</sub>, 1 mM DTT, 250 mM sucrose) for 1 hr at 30°C. The reactions were quenched by addition of 5 µl of 4X SDS loading buffer followed by boiling. The reaction was analyzed by SDS-PAGE and visualized by Brilliant Blue staining and fluorography.

### **Peptide synthesis and generation of anti-Mlo3me antibody**

Peptides corresponding to amino acid 161-174 in Mlo3 containing unmodified or dimethyl lysine were synthesized by GenScript. The same peptides were used to raise polyclonal rabbit antiserum and to perform affinity purification of antibody.

### **ChIP, ChIP-chip and expression profiling**

ChIPs and ChIP-chip analyses were performed as described previously with antibodies against Swi6, dimethylated H3K9 (Abcam) and Flag M2 (Sigma) (3, 5). The expression profiling was carried out according to a protocol described previously (3). In conventional ChIP assays, enrichment values shown below lanes were calculated by dividing the ratios of band intensities of *ura4*<sup>+</sup> integrated at outer repetitive region of centromere (*cen*) to euchromatic region (*DS/E*) signals in the ChIP DNA against those of input as measured by multiplex PCR. For average gene profiling shown in fig. S6, ORFs were divided into 30 equally sized segments. Geometric averages of the corresponding segments between ORFs were calculated and plotted as average enrichments over a 50bp region. 0 in X-axis represents the beginning of the ORF, and 1500 bp represents the end of the ORF. Y axis shows the average enrichments in log<sub>2</sub> scale. Microarray

data are available at the US National Center for Biotechnology Information Gene Expression Omnibus (NCBI GEO) under the accession numbers GSE26999 and GSE17271.

### **Cross-correlation matrix and cluster analysis**

For cross-correlation matrix and cluster analysis (Fig. 4C), median antisense ratios (mutant/WT) for 842 genes were calculated for each expression dataset. Linear regression analysis was performed between data sets, and Pearson-correlation index ( $r$ ) was calculated.  $r$  value were converted into color codes and plotted as a matrix. Cluster analysis was performed according to the Euclidean distance of the  $r$  values between mutant strains.

### **Immunoprecipitation, protein purification and mass spectrometry**

Flag-tagged Mlo3 and Cid14 were purified as described previously (6). Mlo3-HA immunoprecipitation was performed using the same protocol. Purified samples were either resolved by SDS-PAGE and visualized by Brilliant Blue staining or subjected to tandem MS (LC-MS/MS) analyses. Western blot analyses of purified samples was performed by using rabbit anti-HA (Abcam), Flag M2 (Sigma), anti-Penta-His (Molecular Probes), anti-Chp1 (Abcam) and rabbit anti-Myc (A-14, Santa Cruz). A longer exposure time was used to obtain the image shown for the anti-Flag (Fig. 1A) or anti-Myc (fig. S1) input blot compared to that of IP blot. For performing the RNase/DNase treatment shown in Fig. 4B, the immunoprecipitated samples were treated with or without 20ug of RNaseA/H mixture and/or 33ug DNase I before the final wash as indicated. The mass spectrometry analysis was performed as described previously (3). In brief, the tryptic peptides from each SDS-PAGE gel band were analyzed by a nano-capillary HPLC system (Agilent 1100, Agilent Technologies) with a 10 cm integrated  $\mu$ RPLC-electrospray ionization (ESI) emitter columns (made in house), coupled online with an linear ion-trap (IT) mass spectrometer (LTQ XP, Thermo Fisher Scientific). The peptides were eluted using a linear gradient 2% mobile phase B (acetonitrile with 0.1% formic acid) to 42% mobile phase B within 40 min at a constant flow rate of 250 nL/min. The seven most intense molecular ions in the MS scan were sequentially selected for subsequent collision-induced dissociation (CID) using a normalized collision energy of 35%. The ion source capillary voltage and temperature were set at 1.7 kV and 200 °C, respectively. The MS/MS data were searched against UniProt *S. pombe* database

from the European Bioinformatics Institute (<http://www.ebi.ac.uk/integr8>) using BioWorks interfaced SEQUEST (Thermo Fisher Scientific). Methionine oxidation (15.99) was searched as differential modifications. Up to two missed cleavage sites were allowed during the database search. The cut-off for legitimate identifications were charge state dependent cross correlation ( $X_{\text{corr}} \geq 2.0$  for  $[M+H]^+$ ,  $\geq 2.5$  for  $[M+2H]^{2+}$  and  $\geq 3.0$  for  $[M+3H]^{3+}$  with delta correlation ( $\Delta C_n \geq 0.10$ ).

### RNA analysis

Northern Blot was performed as previously described (3). Northern Blot for siRNA detection was carried out as previously described (7). Strand specific RT-PCRs were performed using centromeric primers as reported (8).

### References:

1. A. G. Thakurta, G. Gopal, J. H. Yoon, L. Kozak, R. Dhar, *EMBO J.* **24**, 2512 (2005).
2. S. Jia, R. Kobayashi, S. I. Grewal, *Nat. Cell Biol.* **7**, 1007 (2005).
3. M. Zofall *et al.*, *Nature* **461**, 419 (2009).
4. J. Nakayama, J. C. Rice, B. D. Strahl, C. D. Allis, S. I. Grewal, *Science* **292**, 110 (2001).
5. H. P. Cam *et al.*, *Nat. Genet* **37**, 809 (2005).
6. K. Zhang, K. Mosch, W. Fischle, S. I. Grewal, *Nat. Struct. Mol. Biol.* **15**, 381 (2008).
7. T. Sugiyama *et al.*, *Cell* **128**, 491 (2007).
8. T. A. Volpe *et al.*, *Science* **297**, 1833 (2002).
